# Supplementary material for: Establishing Components of Programmes to Reduce Restrictive Practices in Adult Mental Health Inpatient Services: A Behaviour Change Technique Analysis
Source: Research Square preprint supplement (doi:10.21203/rs.3.rs-99034/v1), 2020-11-03
Supplement: Supplementary file 1 [file d3f54dcefdd411797732d057.docx]

| 1. Abderhalden C, Needham I, Dassen T, Halfens R, Haug HJ, Fischer JE. Structured risk assessment and violence in acute psychiatric wards: Randomised controlled trial. Br J Psychiatry. 2008;193(1):44-50. doi: https://dx.doi.org/10.1192/bjp.bp.107.045534. |
| --- |
| 1. Agency for Healthcare Research and Quality. Multipronged Strategy Reduces Use of Seclusion and Restraints to Manage Aggression at Inpatient Behavioral Health Facility. 2009. Available from: https://innovations.ahrq.gov/profiles/multipronged-strategy-reduces-use-seclusion-and-restraints-manage-aggression-inpatient |
| 1. Alberta Health Services. Restraint as a Last Resort Flowchart. 2017. |
| 1. Allen DE, de Nesnera A, Souther JW. Executive-level reviews of seclusion and restraint promote interdisciplinary collaboration and innovation. J Am Psychiatr Nurses Assoc. 2009;15(4):260-4. doi: https://dx.doi.org/10.1177/1078390309342749. |
| 1. APA APNA & NAPHS. Learning from each other: Success stories and ideas for reducing restraint / seclusion in behavioral health. . Washington, DC.: American Hospital Association; 2011 [cited 2019 01/03/19]; Available from: http://www.aha.org/content/00-10/learningfromeachother.pdf. |
| 1. Andersen C, Kolmos A, Andersen K, Sippel V, Stenager E. Applying sensory modulation to mental health inpatient care to reduce seclusion and restraint: A case control study. Nord J Psychiatry. 2017;71(7):525-8. doi: https://dx.doi.org/10.1080/08039488.2017.1346142. |
| 1. APNA: Allen D, Bradley, S., Gary, S., Lauster, T., Catano-Mahoney, G., Souther, J. APNA elearning center: 2017-seclusion and restraint: Assessment and risk mitigation. 2017; Available from: https://e-learning.apna.org/products/2017-seclusion-and-restraint-assessment-and-risk-mitigation#tab-product_tab_overview. |
| 1. AQUA. Restrain Yourself Toolkit. 2014; Available from: https://www.aquanw.nhs.uk/resources/restrain-yourself-toolkit/20917. |
| 1. Aremu B, Hill PD, McNeal JM, Petersen MA, Swanberg D, Delaney KR. Implementation of Trauma-Informed Care and Brief Solution-Focused Therapy. J Psychosoc Nurs Ment Health Serv. 2019;56:16-22. |
| 1. Ash D, Metcalfe P, Burton C. Reduction in the use of seclusion with the introduction of recovery principles in an acute psychiatric unit. Schizophrenia Research. 2014;1:S292-S3. |
| 1. Ash D, Suetani S, Nair J, Halpin M. Recovery-based services in a psychiatric intensive care unit - the consumer perspective. Australas. 2015;23(5):524-7. doi: https://dx.doi.org/10.1177/1039856215593397. |
| 1. Ashcraft L, Anthony W, Ashcraft L, Anthony W. Eliminating seclusion and restraint in recovery-oriented crisis services. Psychiatr Serv. 2008;59(10):1198-202. doi: 10.1176/appi.ps.59.10.1198. |
| 1. Ashcraft L, Bloss M, Anthony WA. Best practices: The development and implementation of "no force first" as a best practice. Psychiatr Serv. 2012;63(5):415-7. doi: https://dx.doi.org/10.1176/appi.ps.20120p415. |
| 1. Barton SA, Johnson MR, Price LV. Achieving restraint-free on an inpatient behavioral health unit. J Psychosoc Nurs Ment Health Serv. 2009;47(1):34-40. |
| 1. APA APNA & NAPHS. Learning from each other: Success stories and ideas for reducing restraint / seclusion in behavioral health. Washington, DC.: American Hospital Association; 2011 [cited 2019 01/03/19]; Available from: http://www.aha.org/content/00-10/learningfromeachother.pdf. |
| 1. Beckett P, Holmes D, Phipps M, Patton D, Molloy L. Trauma-informed care and practice: Practice improvement strategies in an inpatient mental health ward. J Psychosoc Nurs Ment Health Serv. 2017;55(10):34-8. doi: https://dx.doi.org/10.3928/02793695-20170818-03. |
| 1. Beezhold J, Williams P, Taylor J, Harris A, Kandasamy S, editors. A quasi-experimental controlled intervention to reduce violence on an acute psychiatric ward. European Psychiatry Conference: 18th European Congress of Psychiatry; 2010; Munich Germany. |
| 1. Belanger S. The ‘S&R Challenge’: Reducing the use of seclusion and restraint in a state psychiatric hospital. Journal for Healthcare Quality. 2001;23(1):19-24. |
| 1. Bell A, Gallacher N. Succeeding in sustained reduction in the use of restraint using the improvement model. 2016. doi: https://dx.doi.org/10.1136/bmjquality.u211050.w4430. |
| 1. British Institute of Learning Disablities. Accreditation provider list. 2019 [cited 2019 01/03/19]; Available from: http://www.bild.org.uk/our-services/pitrainingaccreditation/accreditation-provider-list/. |
| 1. Bjorkdahl A, Hansebo G, Palmstierna T. The influence of staff training on the violence prevention and management climate in psychiatric inpatient units. J Psychiatr Ment Health Nurs. 2013;20(5):396-404. doi: https://dx.doi.org/10.1111/j.1365-2850.2012.01930.x. |
| 1. Björkdahl A, Heilig M, Palmstierna T, Hansebo G. Changes in the occurrences of coercive interventions and staff injuries on a psychiatric intensive care unit. Arch Psychiatr Nurs. 2007;21(5):270-7. |
| 1. Blair EW, Woolley S, Szarek BL, Mucha TF, Dutka O, Schwartz HI, et al. Reduction of seclusion and restraint in an inpatient psychiatric setting: A pilot study. Psychiatr Q. 2017;88(1):1-7. |
| 1. Blair M, Moulton-Adelman F. The engagement model for reducing seclusion and restraint: 13 years later. J Psychosoc Nurs Ment Health Serv. 2015;53(3):39-45. doi: https://dx.doi.org/10.3928/02793695-20150211-01. |
| 1. Borckardt JJ, Madan A, Grubaugh AL, Danielson CK, Pelic CG, Hardesty SJ, et al. Systematic investigation of initiatives to reduce seclusion and restraint in a state psychiatric hospital. Psychiatr Serv. 2011;62(5):477-83. doi: https://dx.doi.org/10.1176/ps.62.5.pss6205_0477. |
| 1. Boumans CE, Egger JI, Bouts RA, Hutschemaekers GJ. Seclusion and the importance of contextual factors: An innovation project revisited. Int J Law Psychiatry. 2015;41:1-11. doi: https://dx.doi.org/10.1016/j.ijlp.2015.03.001. |
| 1. Bowers L, Brennan G, Flood C, Lipang M, Oladapo P. Preliminary outcomes of a trial to reduce conflict and containment on acute psychiatric wards: City nurses. J Psychiatr Ment Health Nurs. 2006;13(2):165-72. |
| 1. Bowers L, Flood C, Brennan G, Allan T. A replication study of the city nurse intervention: Reducing conflict and containment on three acute psychiatric wards. J Psychiatr Ment Health Nurs. 2008;15(9):737-42. doi: http://dx.doi.org/10.1111/j.1365-2850.2008.01294.x. |
| 1. Bowers L, James K, Quirk A, Simpson A, Stewart D, Hodsoll J. Reducing conflict and containment rates on acute psychiatric wards: The safewards cluster randomised controlled trial. International Journal of Nursing Studies. 2015;52(9):1412-22. doi: http://dx.doi.org/10.1016/j.ijnurstu.2015.05.001. |
| 1. Bowers L, Stewart D, Papadopoulos C, Dack C, Ross J, Khanom H, et al. Inpatient violence and aggression: A literature review. London: King's College London; 2011. |
| 1. Burhan A, Black E, Ross T, Toogood P, O'Regan T. The impact of a primary nursing care delivery approach upon the frequency and effectiveness of prn medication. American Journal of Geriatric Psychiatry. 2010;1:S82-S3. doi: http://dx.doi.org/10.1097/01.JGP.0000369161.13792.ad. |
| 1. Bybel B. Does education of alternative measures decrease the use of physical restraints and seclusion? : University of Phoenix; 2011. |
| 1. Cabral A, Carthy J. Can safewards improve patient care and safety in forensic wards? A pilot study. British Journal of Mental Health Nursing. 2017;6(4):165-71. |
| 1. Calabro K, Mackey TA, Williams S. Evaluation of training designed to prevent and manage patient violence. Issues Ment Health Nurs. 2002;23(1):3-15. |
| 1. Care Quality Commission. Mental Health Act A focus on restrictive intervention reduction programmes in inpatient mental health services: East London NHS Foundation Trust. 2017. |
| 1. Chabora N, Judge-Gorny M, Grogan K. The four s model in action for de-escalation. An innovative state hospital-university collaborative endeavor. J Psychosoc Nurs Ment Health Serv. 2003;41(1):22-8. |
| 1. Chandler GE. Reducing use of restraints and seclusion to create a culture of safety. J Psychosoc Nurs Ment Health Serv. 2012;50(10):29-36. doi: https://dx.doi.org/10.3928/02793695-20120906-97. |
| 1. Chang NA, Grant PM, Luther L, Beck AT. Effects of a recovery-oriented cognitive therapy training program on inpatient staff attitudes and incidents of seclusion and restraint. Community Ment Health J. 2014;50(4):415-21. doi: https://dx.doi.org/10.1007/s10597-013-9675-6. |
| 1. Cheema F, McKechnie L, Riley P, Carlyle A, Ross J, Renwick C, et al. Improving patient safety in mental health through quality risk management. European Psychiatry Conference: 21st European Congress of Psychiatry, EPA. 2013;28(SUPPL. 1). |
| 1. Ching H, Daffern M, Martina T, Thomasa S. Reducing the use of seclusion in a forensic psychiatric hospital: Assessing the impact on aggression, therapeutic climate and staff confidence. Journal of Forensic Psychiatry and Psychology. 2010;21(5):737-60. doi: http://dx.doi.org/10.1080/14789941003681361. |
| 1. Clark LL, Shurmer DL, Kowara D, Nnatu I. Behavioural support chart. 2019. |
| 1. Clark LL, Shurmer DL, Kowara D, Nnatu I. Reducing restrictive practice: Developing and implementing behavioural support plans. British Journal of Mental Health Nursing. 2017;6(1):23-8. |
| 1. Clarke DE, Brown AM, Griffith P. The Brøset violence checklist: Clinical utility in a secure psychiatric intensive care setting. J Psychiatr Ment Health Nurs. 2010;17(7):614-20. doi: https://dx.doi.org/10.1111/j.1365-2850.2010.01558.x. |
| 1. Cockerton R, O'Brien A, Oates J. Implementing positive and proactive care. Mental Health Practice. 2015;19(4):36-9. |
| 1. Colton D. Checklist for assessing your organization's readiness for reducing seclusion and restraint. 2004. |
| 1. Cowin L, Davies R, Estall G, Berlin T, Fitzgerald M, Hoot S. De-escalating aggression and violence in the mental health setting. International Journal of Mental Health Nursing. 2003;12(1):64-73. |
| 1. Crisis Prevention Institute (CPI). De-escalation techniques. 2010; You Tube video]. Available from: https://www.youtube.com/watch?v=pBe4A32fpyI. |
| 1. Cummings KS, Grandfield SA, Coldwell CM. Caring with comfort rooms. Reducing seclusion and restraint use in psychiatric facilities. J Psychosoc Nurs Ment Health Serv. 2010;48(6):26-30. doi: https://dx.doi.org/10.3928/02793695-20100303-02. |
| 1. D.ESCAL8. PBS and de-escalation: Developing Positive Relationships, Supporting Those In Distress. Not reported; Training provider link]. Available from: http://de-escalate.com. |
| 1. Department of Mental Health and Addiction Services. DMHAS guidelines for development of comfort rooms philosophy the differences between comfort rooms and sensory rooms (comfort and comforting environments. Connecticut2019. |
| 1. Dewey K, Brill C. Decrease in restraint use in a study of a geropsychiatric unit. J Psychosoc Nurs Ment Health Serv. 2000;38(10):14-8. |
| 1. Donat DC. Impact of a clinical-administrative review procedure on reducing reliance on psychotropic PRN medication. Psychiatr Rehabil J. 2006;29(3):215. |
| 1. Donat DC. Employing behavioral methods to improve the context of care in a public psychiatric hospital: Reducing hospital reliance on seclusion/restraint and psychotropic prn medication. Cognitive and Behavioral Practice. 2002;9(1):28-37. doi: http://dx.doi.org/10.1016/S1077-7229%2802%2980036-0. |
| 1. Donat DC. Impact of improved staffing on seclusion/restraint reliance in a public psychiatric hospital. Psychiatr Rehabil J. 2002;25(4):413-6. |
| 1. D'Orio BM, Purselle D, Stevens D, Garlow SJ. Reduction of episodes of seclusion and restraint in a psychiatric emergency service. Psychiatr Serv. 2004;55(5):581-3. |
| 1. Duxbury J, Baker J, Downe S, Jones F, Greenwood P, Thygesen H, et al. Minimising the use of physical restraint in acute mental health services: The outcome of a restraint reduction programme (‘REsTRAIN YOURSELF’). International Journal of Nursing Studies. 2019;95:40-8. |
| 1. Fletcher J, Spittal M, Brophy L, Tibble H, Kinner S, Elsom S, et al. Outcomes of the victorian safewards trial in 13 wards: Impact on seclusion rates and fidelity measurement. International Journal of Mental Health Nursing. 2017;26(5):461-71. doi: https://dx.doi.org/10.1111/inm.12380. |
| 1. Fletcher E, Stevenson C. Launching the Tidal Model in an adult mental health programme. Nursing Standard. 2001;15(49):33. |
| 1. Fluttert FAJ, van Meijel B, Bjørkly S, Nijman H, Grypdonck M. Protocol Early Recognition Method. 2013. |
| 1. Fluttert FAJ, van Meijel B, Nijman H, Bjørkly S, Grypdonck M. Preventing aggressive incidents and seclusions in forensic care by means of the 'early recognition method'. Journal of Clinical Nursing. 2010;19(11/12):1529-37. doi: 10.1111/j.1365-2702.2009.02986.x. |
| 1. Fluttert FAJ. Forensic Early Signs of Aggression Inventory [FESAI]. 2010. |
| 1. Forster PL, Cavness C, Phelps MA. Staff training decreases use of seclusion and restraint in an acute psychiatric hospital. Arch Psychiatr Nurs. 1999;13(5):269-71. |
| 1. Friedman R, Nurenberg JR, Birnbaum S, Schleifer SJ. Using structured clinical feedback to encourage alternatives to use of "p.R.N." Medication in a state psychiatric hospital. J Psychiatr Pract. 2012;18(5):381-7. |
| 1. Geoffrion S, Goncalves J, Giguere CE, Guay S. Impact of a program for the management of aggressive behaviors on seclusion and restraint use in two high-risk units of a mental health institute. Psychiatr Q. 2018;89(1):95-102. doi: https://dx.doi.org/10.1007/s11126-017-9519-6. |
| 1. Georgieva I, de Haan G, Smith W, Mulder CL. Successful reduction of seclusion in a newly developed psychiatric intensive care unit. Journal of Psychiatric Intensive Care. 2010;6(1):31-8. doi: http://dx.doi.org/10.1017/S1742646409990082. |
| 1. Godfrey JL, McGill AC, Jones NT, Oxley SL, Carr RM. Anatomy of a transformation: A systematic effort to reduce mechanical restraints at a state psychiatric hospital. Psychiatr Serv. 2014;65(10):1277-80. doi: https://dx.doi.org/10.1176/appi.ps.201300247. |
| 1. Gonzalez TD. Impact of active listening training at a california state hospital: A quantitative study. Dissertation Abstracts International: Section B: The Sciences and Engineering. 2009;70(4-B):2196. |
| 1. Gonzalez-Torres MA, Fernandez-Rivas A, Bustamante S, Rico-Vilademoros F, Vivanco E, Martinez K, et al. Impact of the creation and implementation of a clinical management guideline for personality disorders in reducing use of mechanical restraints in a psychiatric inpatient unit. 2014. doi: https://dx.doi.org/10.4088/PCC.14m01675. |
| 1. Goulet MH, Larue C, Lemieux AJ. A pilot study of "post-seclusion and/or restraint review" intervention with patients and staff in a mental health setting. Perspect Psychiatr Care. 2017. doi: https://dx.doi.org/10.1111/ppc.12225. |
| 1. Crisis Prevention Institute (CPI). Unrestrained - BERT team intervention approach. Gulbranson, James and Ruegemer, Paul2016. |
| 1. Guzman-Parra J, Aguilera Serrano C, Garcia-Sanchez JA, Pino-Benitez I, Alba-Vallejo M, Moreno-Kustner B, et al. Effectiveness of a multimodal intervention program for restraint prevention in an acute spanish psychiatric ward. J Am Psychiatr Nurses Assoc. 2016;22(3):233-41. doi: https://dx.doi.org/10.1177/1078390316644767. |
| 1. Guzman-Parra J, Garcia-Sanchez JA, Pino-Benitez I, Alba-Vallejo M, Mayoral-Cleries F. Effects of a regulatory protocol for mechanical restraint and coercion in a spanish psychiatric ward. Perspect Psychiatr Care. 2015;51(4):260-7. doi: https://dx.doi.org/10.1111/ppc.12090. |
| 1. Harbourview. Training video. Not reported. |
| 1. Hart C. Training video. Not reported. |
| 1. Hayashi F, Harsany A, Varvara M, Wong PY, Lantz MS. The elimination of seclusion in a geriatric inpatient unit: Using environmental modification to effect a cultural change. American Journal of Geriatric Psychiatry. 2015;1:S122-S3. |
| 1. Hayes A, Russ MJ. Discontinuing the use of prn intramuscular medication for agitation in an acute psychiatric hospital. Psychiatr Q. 2016;87(1):25-9. doi: https://dx.doi.org/10.1007/s11126-015-9359-1. |
| 1. Health Prince Edward Island. Self directed resource guide: Least restraint 1 introduction. Not reported [cited 2019 01/03/19]; Available from: http://www.gov.pe.ca/photos/original/src_least_restr.pdf. |
| 1. Hellerstein DJ, Staub AB, Lequesne E. Decreasing the use of restraint and seclusion among psychiatric inpatients. J Psychiatr Pract. 2007;13(5):308-17. doi: http://dx.doi.org/10.1097/01.pra.0000290669.10107.ba. |
| 1. Hernandez A, Riahi S, Stuckey MI, Mildon BA, Klassen PE. Multidimensional approach to restraint minimization: The journey of a specialized mental health organization. International Journal of Mental Health Nursing. 2017;26(5):482-90. doi: 10.1111/inm.12379. |
| 1. Higgins N, Dart N, Meehan T, Fulbrook P, Kilshaw M, Anderson D, et al. Implementation of safewards across three inpatient mental health units. 2017. |
| 1. Higgins N, Dart N, Meehan T, Fulbrook P, Kilshaw M, Anderson D, et al. The safewards program in queensland public hospital acute mental health settings. Aust Nurs Midwifery J. 2016;23(11):41. |
| 1. Hochstrasser L, Frohlich D, Schneeberger AR, Borgwardt S, Lang UE, Stieglitz RD, et al. Long-term reduction of seclusion and forced medication on a hospital-wide level: Implementation of an open-door policy over 6 years. Eur Psychiatry. 2017;48:51-7. doi: https://dx.doi.org/10.1016/j.eurpsy.2017.09.008. |
| 1. Hochstrasser L, Voulgaris A, Möller J, Zimmermann T, Steinauer R, Borgwardt S, et al. Reduced frequency of cases with seclusion is associated with “opening the doors” of a psychiatric intensive care unit. Frontiers in Psychiatry. 2018;9:57. |
| 1. Huckshorn KA. Six core strategies to reduce the use of seclusion and restraint planning tool. 2005. |
| 1. Huckshorn KA, Funston D, editors. Preventing Violence, Trauma, and the Use of Seclusion and Restraint in Mental Health Settings: Real Reduction Experiences What Worked?Not reported. |
| 1. Huckshorn KA. Reducing seclusion and restraint use in mental health settings: A phenomenological study of hospital leader and staff experiences [Ph.D.]. Ann Arbor: Capella University; 2012. |
| 1. Hyde S, Fulbrook P, Fenton K, Kilshaw M. A clinical improvement project to develop and implement a decision‐making framework for the use of seclusion. International Journal of Mental Health Nursing. 2009;18(6):398-408. |
| 1. JKM Training Inc. Reducing Restraints. Not reported [cited 2019 01/03/19]; Available from: https://www.safecrisismanagement.com/reducing-restraints.aspx. |
| 1. Jonikas JA, Cook JA, Rosen C, Laris A, Kim JB. A program to reduce use of physical restraint in psychiatric inpatient facilities. Psychiatr Serv. 2004;55(7):818-20. doi: http://dx.doi.org/10.1176/appi.ps.55.7.818. |
| 1. Jungfer HA, Schneeberger AR, Borgwardt S, Walter M, Vogel M, Gairing SK, et al. Reduction of seclusion on a hospital-wide level: Successful implementation of a less restrictive policy. J Psychiatr Res. 2014;54:94-9. doi: https://dx.doi.org/10.1016/j.jpsychires.2014.03.020. |
| 1. Kayes D, Humphris E. Introduction of restraint and seclusion reduction program in Margaret Tobin centre. Aust Nurs Midwifery J. 2015. |
| 1. Khadivi A, Patel RC, Atkinson AR, Levine JM. Association between seclusion and restraint and patient-related violence. Psychiatr Serv. 2004;55(11):1311-2. |
| 1. Kontio R, Pitkanen A, Joffe G, Katajisto J, Valimaki M. Elearning course may shorten the duration of mechanical restraint among psychiatric inpatients: A cluster-randomized trial. Nord J Psychiatry. 2014;68(7):443-9. doi: https://dx.doi.org/10.3109/08039488.2013.855254. |
| 1. Laker C, Gray R, Flach C. Case study evaluating the impact of de-escalation and physical intervention training. J Psychiatr Ment Health Nurs. 2010;17(3):222-8. doi: https://dx.doi.org/10.1111/j.1365-2850.2009.01496.x. |
| 1. Lee S, Cox A, Whitecross F, Williams P, Hollander Y. Sensory assessment and therapy to help reduce seclusion use with service users needing psychiatric intensive care. Journal of Psychiatric Intensive Care. 2010;6(2):83-90. doi: http://dx.doi.org/10.1017/S1742646410000014. |
| 1. Lewis M, Taylor K, Parks J. Crisis prevention management: A program to reduce the use of seclusion and restraint in an inpatient mental health setting. Issues Ment Health Nurs. 2009;30(3):159-64. doi: https://dx.doi.org/10.1080/01612840802694171. |
| 1. Lloyd C, King R, Machingura T. An investigation into the effectiveness of sensory modulation in reducing seclusion within an acute mental health unit. Advances in Mental Health. 2014;12(2):93-100. doi: http://dx.doi.org/10.1080/18374905.2014.11081887. |
| 1. Lo CT. Implementation of a psychiatric emergency response team on adult psychiatric inpatient units [D.N.P.]. Ann Arbor: The College of St. Scholastica; 2015. |
| 1. Lombardo C, Van Bortel T, Wagner AP, Kaminskiy E, Wilson C, Krishnamoorthy T, et al. PROGRESS: the PROMISE governance framework to decrease coercion in mental healthcare. BMJ Open Quality. 2018;7(3):e000332. |
| 1. Long CG, West R, Afford M, Collins L, Dolley O. Reducing the use of seclusion in a secure service for women. Journal of Psychiatric Intensive Care. 2015;11(2):84-94. |
| 1. Madan A, Borckardt JJ, Grubaugh AL, Danielson CK, McLeod-Bryant S, Cooney H, et al. Efforts to reduce seclusion and restraint use in a state psychiatric hospital: A ten-year perspective. Psychiatr Serv. 2014;65(10):1273-6. doi: https://dx.doi.org/10.1176/appi.ps.201300383. |
| 1. Maguire T, Daffern M, Bowe SJ, McKenna B. Risk assessment and subsequent nursing interventions in a forensic mental health inpatient setting: Associations and impact on aggressive behaviour. 2017. doi: https://dx.doi.org/10.1111/jocn.14107. |
| 1. Maguire T, Young R, Martin T. Seclusion reduction in a forensic mental health setting. J Psychiatr Ment Health Nurs. 2012;19(2):97-106. doi: https://dx.doi.org/10.1111/j.1365-2850.2011.01753.x. |
| 1. Mann-Poll PS, Smit A, Noorthoorn EO, Janssen WA, Koekkoek B, Hutschemaekers G. Long-term impact of a tailored seclusion reduction program: Evidence for change? Psychiatr Q. 2018;89(3):733-46. |
| 1. Mann-Poll PS, Smit A, van Doeselaar M, Hutschemaekers GJ. Professionals' attitudes after a seclusion reduction program: Anything changed? Psychiatr Q. 2013;84(1):1-10. doi: https://dx.doi.org/10.1007/s11126-012-9222-6. |
| 1. Martin BA, Suane SN. Effect of training on sensory room and cart usage. Occupational Therapy in Mental Health. 2012;28(2):118-28. doi: 10.1080/0164212X.2012.679526. |
| 1. McCue RE, Urcuyo L, Lilu Y, Tobias T, Chambers MJ. Reducing restraint use in a public psychiatric inpatient service. J Behav Health Serv Res. 2004;31(2):217-24. |
| 1. McEvedy S, Maguire T, Furness T, McKenna B. Sensory modulation and trauma-informed-care knowledge transfer and translation in mental health services in victoria: Evaluation of a statewide train-the-trainer intervention. Nurse Educ Pract. 2017;25:36-42. doi: https://dx.doi.org/10.1016/j.nepr.2017.04.012. |
| 1. McEwan S, McClarty D, Porter L. Achieving violence and restraint reduction in an ipcu. British Journal of Mental Health Nursing. 2016;5(1):38-42. |
| 1. Melin RD. Team responses to inpatient aggression: The effects of institutional training on restraint utilization patterns. Dissertation Abstracts International: Section B: The Sciences and Engineering. 2002;63(4-B):2065. |
| 1. Mind. Restraint in mental health services. London: Mind; 2015. |
| 1. Mistral W, Hall A, McKee P. Using the therapeutic community principles to improve the functioning of a high care psychiatric ward in the uk. International Journal of Mental Health Nursing. 2002;11(1):10-7. doi: http://dx.doi.org/10.1046/j.1440-0979.2002.00220.x. |
| 1. Morrrow J, Huckshorn, K., Leff, H.S., Wieman, D., Camacho-Gonsalves, T., Anderson, T. Alternatives to Seclusion and Restraint SAMHSA State Infrastructure Grant Evaluation Overview. APHA 134th Annual Meeting. Boston, MA; USA2006. |
| 1. Natale G, Fitzgerald A, Landry M, Harmon K. Applying Jean Watson's caring theory to reduce restraint use in the acute psychiatric area. Pelican News. 2017. |
| 1. Needham I, Abderhalden C, Meer R, Dassen T, Haug HJ, Halfens RJ, et al. The effectiveness of two interventions in the management of patient violence in acute mental inpatient settings: Report on a pilot study. J Psychiatr Ment Health Nurs. 2004;11(5):595-601. |
| 1. Newman J, Paun O, Fogg L. Effects of a Staff Training Intervention on Seclusion Rates on an Adult Inpatient Psychiatric Unit. J Psychosoc Nurs Ment Health Serv. 2018;56(6):23-30. |
| 1. NHS Improvement. Mersey Care NHS Foundation Trust - Using the DASA tool to assess the risk of violence among psychiatric inpatients. London2018. |
| 1. Noorthoorn E, Janssen W, Theunissen J, Hesta H, de Vries W, Hutschemaekers G, et al. The power of day-to-day motivational techniques and family participation in reducing seclusion. International Journal of Mental Health. 2008;37(3):81-98. doi: http://dx.doi.org/10.2753/IMH0020-7411370304. |
| 1. Noorthoorn E, Voskes Y, Janssen WA, Mulder CL, van de Sande R, Nijman HL, et al. Seclusion reduction in dutch mental health care: Did hospitals meet goals? Psychiatr Serv. 2016;67(12):1321-7. |
| 1. Novak T, Scanlan J, McCaul D, MacDonald N, Clarke T. Pilot study of a sensory room in an acute inpatient psychiatric unit. Australas. 2012;20(5):401-6. doi: https://dx.doi.org/10.1177/1039856212459585. |
| 1. Northumberland Tyne and Wear NHS Foundation Trust. Talk 1st ward assessment. Not reported. |
| 1. Northumberland Tyne and Wear NHS Foundation Trust. Positive and safe debrief policy and tool. 2019. |
| 1. Northumberland Tyne and Wear NHS Foundation Trust. Positive and safe positive practice process outline. Not reported. |
| 1. Northumberland Tyne and Wear NHS Foundation Trust. Positive and Safe Care Annual Report 2017. 2017. |
| 1. Northumberland Tyne and Wear NHS Foundation Trust. Positive and Safe Care Annual Report 2018. 2018. |
| 1. Omolewa P. The impact of instructive educational program on physical restraint reduction in acute mental health hospitals [Ph.D.]. Ann Arbor: Walden University; 2012. |
| 1. Parasurum R, Chua PS, Kannusamy P. A randomised controlled study examining the impact of a staffing model and nursing care delivery system on patient, nurse and organisational outcomes. Annals of the Academy of Medicine Singapore. 2011;1):S8. |
| 1. Pollard R, Yanasak EV, Rogers SA, Tapp A. Organizational and unit factors contributing to reduction in the use of seclusion and restraint procedures on an acute psychiatric inpatient unit. Psychiatr Q. 2007;78(1):73-81. |
| 1. Prescott DL, Madden LM, Dennis M, Tisher P, Wingate C. Reducing mechanical restraints in acute psychiatric care settings using rapid response teams. J Behav Health Serv Res. 2007;34(1):96-105. |
| 1. Price O, Burbery P, Leonard S, Doyle M. Evaluation of safewards in forensic mental health. Mental Health Practice. 2016;19(8):14-21. |
| 1. Putkonen A, Kuivalainen S, Louheranta O, Repo-Tiihonen E, Ryynanen OP, Kautiainen H, et al. Cluster-randomized controlled trial of reducing seclusion and restraint in secured care of men with schizophrenia. Psychiatr Serv. 2013;64(9):850-5. doi: https://dx.doi.org/10.1176/appi.ps.201200393. |
| 1. Qurashi I, Johnson D, Shaw J, Johnson B. Reduction in the use of seclusion in a high secure hospital: A retrospective analysis. Journal of Psychiatric Intensive Care. 2010;6(2):109-15. doi: http://dx.doi.org/10.1017/S174264640999015X. |
| 1. Repique RJ, Vernig PM, Lowe J, Thompson JA, Yap TL. Implementation of a recovery-oriented training program for psychiatric nurses in the inpatient setting: A mixed-methods hospital quality improvement study. Arch Psychiatr Nurs. 2016;30(6):722-8. doi: https://dx.doi.org/10.1016/j.apnu.2016.06.003. |
| 1. NAVIGO. Respect training from NAVIGO. Not reported [cited 2019 01/03/19]; Training company link]. Available from: https://www.navigocare.co.uk/our-services/training-and-opportunities/respect-training-solutions/. |
| 1. Restraint Reduction Network. Six Key Restraint Reduction Strategies. 2019; Available from: http://restraintreductionnetwork.org/. |
| 1. Riahi S, Dawe IC, Stuckey MI, Klassen PE. Implementation of the six core strategies for restraint minimization in a specialized mental health organization. J Psychosoc Nurs Ment Health Serv. 2016;54(10):32-9. doi: https://dx.doi.org/10.3928/02793695-20160920-06. |
| 1. Riemer D, Corwith C. Application of core strategies: Reducing seclusion & restraint use. On the Edge. 2007;13(3):7-10. |
| 1. Riley D, Benson I, Kilcoyne J, Angus D. No Force First: eliminating restraint in a mental health trust. Nursing Times. 2018;114:38-9. |
| 1. Royal College of Psychiatrists. Healthcare commission national audit of violence 2006–7. London: Royal College of Psychiatrists 2007. |
| 1. SAMSHA. Coordinating Center: Alternatives to Restraint & Seclusion (ARS) State Infrastructure Grant (SIG) Program. First Round of ARS SIG Grantees. Evaluation Report. Maryland: SAMSHA |
| 1. Sarkar J. Reducing violence through the use of structured therapies. Annals of the Academy of Medicine Singapore. 2013;1):S256. |
| 1. Scottish Patient Safety Programme. Patient Safety including trauma informed care and usage of seclusion and restraint. 2014. |
| 1. Scottish Patient Safety Programme. Restraint and seclusion driver diagram. Not reported [cited 2019]; Available from: http://ihub.scot/media/1967/seclusion-restraint-v18.pdf. |
| 1. Short R, Sherman ME, Raia J, Bumgardner C, Chambers A, Lofton V. Safety guidelines for injury-free management of psychiatric inpatients in precrisis and crisis situations. Psychiatr Serv. 2008;59(12):1376-8. doi: https://dx.doi.org/10.1176/appi.ps.59.12.1376. |
| 1. Sivak K. Implementation of comfort rooms to reduce seclusion, restraint use, and acting-out behaviors. J Psychosoc Nurs Ment Health Serv. 2012;50(2):24-34. |
| 1. Smith GM, Davis RH, Bixler EO, Lin H, Altenor A, Altenor RJ, et al. Pennsylvania state hospital system's seclusion and restraint reduction program. Psychiatr Serv. 2005;56(9):1115-22. doi: 10.1176/appi.ps.56.9.1115. |
| 1. Smith P, Millar M. The quiet room: Improving the acute care psychiatric environment. FoNS Improvement Insights. 2014;9(1). |
| 1. Smith S, Jones J. Use of a sensory room on an intensive care unit. J Psychosoc Nurs Ment Health Serv. 2014;52(5):22-30. doi: https://dx.doi.org/10.3928/02793695-20131126-06. |
| 1. South Australia Health. Mental health restraint and seclusion toolkit fact sheet 7 debriefing following an incident of restraint or seclusion the crisis prevention institute (cpi)* coping model. 2019 [cited 2019 01/03/19]; Tool kit]. Available from: http://www.sahealth.sa.gov.au/wps/wcm/connect/public+content/sa+health+internet/clinical+resources/clinical+topics/mental+health/restraint+and+seclusion+in+mental+health. |
| 1. Stead K, Kumar S, Schultz TJ, Tiver S, Pirone CJ, Adams RJ, et al. Teams communicating through stepps. Med J Aust. 2009;190(11 Suppl):S128-32. |
| 1. Steinert T, Eisele F, Goeser U, Tschoeke S, Uhlmann C, Schmid P. Successful interventions on an organisational level to reduce violence and coercive interventions in in-patients with adjustment disorders and personality disorders. Clinical Practice and Epidemiology in Mental Health. 2008;4 (no pagination)(27). doi: http://dx.doi.org/10.1186/1745-0179-4-27. |
| 1. Stensgaard L, Andersen M, Nordentoft M, Hjorthøj C. Implementation of the safewards model to reduce the use of coercive measures in adult psychiatric inpatient units: an interrupted time-series analysis. J Psychiatr Res. 2018;105:147-52. |
| 1. Stirling C, Aiken F, Dale C, Duxbury J. Reducing Restrictive Practices Checklist. CPI, Restrain Reduction Network; 2015. |
| 1. Sullivan AM, Bezmen J, Barron CT, Rivera J, Curley-Casey L, Marino D. Reducing restraints: Alternatives to restraints on an inpatient psychiatric service--utilizing safe and effective methods to evaluate and treat the violent patient. Psychiatr Q. 2005;76(1):51-65. |
| 1. Sullivan D, Wallis M, Lloyd C. Effects of patient-focused care on seclusion in a psychiatric intensive care unit...Including commentary by holmes d and perron a. International Journal of Therapy & Rehabilitation. 2004;11(11):503-8. |
| 1. Sutton D, Wilson M, Van Kessel K, Vanderpyl J. Optimizing arousal to manage aggression: A pilot study of sensory modulation. International Journal of Mental Health Nursing. 2013;22(6):500-11. doi: https://dx.doi.org/10.1111/inm.12010. |
| 1. Szypula F, Martin M. Balancing risk & safety when reducing restraint & seclusion. Not reported. |
| 1. Taxis JC. Ethics and praxis: Alternative strategies to physical restraint and seclusion in a psychiatric setting. Issues Ment Health Nurs. 2002;23(2):157-70. |
| 1. Taylor A, Brown S. 9th National Seclusion and Restraint Conference. 2013; Video]. Available from: https://webcast.gigtv.com.au/Mediasite/Play/9fa51cf1682e41aba3408700cccf8bfb1d?catalog=78ae969f64c24b8787fd5d40d5fd4b8b21. |
| 1. Taylor-Watt J, Cruickshank A, Innes J, Brome B, Shah A. Reducing physical violence and developing a safety culture across wards in East London. British Journal of Mental Health Nursing. 2017;6(1):35-43. |
| 1. Tyne Esk Weardale Valley NHS Trust. Positive Approaches Team 4 day course. 2017. |
| 1. Tyne Esk Weardale Valley NHS Trust. 2017-18 annual report. 2018. |
| 1. Trevarrow R. Chill out room project. Newcastle: Newcastle Tyne and Wear NHS Trust; 2019. |
| 1. Tully J, McSweeney L, Harfield KL, Castle C, Das M. Innovation and pragmatism required to reduce seclusion practices. CNS Spectr. 2016;21(6):424-9. |
| 1. Tully J. A pilot evaluation of strategies to reduce long term segregation on Ascot Ward, Broadmoor. Berkshire2005. |
| 1. van de Sande R, Nijman HL, Noorthoorn EO, Wierdsma AI, Hellendoorn E, van der Staak C, et al. Aggression and seclusion on acute psychiatric wards: Effect of short-term risk assessment. Br J Psychiatry. 2011;199(6):473-8. doi: https://dx.doi.org/10.1192/bjp.bp.111.095141. |
| 1. Visalli H, McNasser G. Reducing seclusion and restraint: Meeting the organizational challenge. J Nurs Care Qual. 2000;14(4):35-44. |
| 1. Wale JB, Belkin GS, Moon R. Reducing the use of seclusion and restraint in psychiatric emergency and adult inpatient services- improving patient-centered care. The Permanente Journal. 2011;15(2):57-62. |
| 1. West London Mental Health Trust. Positive and safe: Violence reduction and management programme – instructors manual. Not reported. |
| 1. Wieman DA, Camacho-Gonsalves T, Huckshorn KA, Leff S. Multisite study of an evidence-based practice to reduce seclusion and restraint in psychiatric inpatient facilities. Psychiatr Serv. 2014;65(3):345-51. doi: https://dx.doi.org/10.1176/appi.ps.201300210. |
| 1. Wishnowsky G. Lessons in reducing seclusion and restraint in aged person's mental health. HNE Handover: For Nurses and Midwives. 2013;6(1). |
| 1. Wolfaardt T. An evaluation of the efficacy of the six core strategies intervention to reduce seclusion and restraint episodes in an acute mental health unit. New Zealand: Auckland University of Technology; 2013. |
| 1. Yakov S, Birur B, Bearden MF, Aguilar B, Ghelani KJ, Fargason RE. Sensory reduction on the general milieu of a high-acuity inpatient psychiatric unit to prevent use of physical restraints: A successful open quality improvement trial. J Am Psychiatr Nurses Assoc. 2017:1078390317736136. doi: https://dx.doi.org/10.1177/1078390317736136. |
| 1. Yang CPP, Hargreaves WA, Bostrom A. Association of empathy of nursing staff with reduction of seclusion and restraint in psychiatric inpatient care. Psychiatr Serv. 2014;65(2):251-4. |
| 1. Zuehlke JB, Kotecki RM, Kern S, Sholty G, Hauser P. Transformation to a recovery-oriented model of care on a veterans administration inpatient unit. Psychiatr Rehabil J. 2016;39(4):361-3. |
